# Supplementary material
Source: PubMed Central journal article supplement (PMC3310299)
Supplement: NIHMS356839-supplement-1_si_001.pdf [file NIHMS356839-supplement-1_si_001.pdf]

## Supporting Information For:

**Reagents for astatination of biomolecules. 6. Intact antibody conjugates formed by reaction with lysine amines have lower kidney concentrations than conjugates of the same antibody formed by reaction with reduced disulfide bonds.**

D. Scott Wilbur<sup>\*,†</sup>, Ming-Kuan Chyan<sup>†</sup>, Hirohisa Nakamae<sup>‡</sup>, Yun Chen<sup>‡</sup>, Donald K. Hamlin<sup>†</sup>, Erlinda B. Santos<sup>‡</sup>, Brian T. Kornblit<sup>‡</sup>, and Brenda M. Sandmaier<sup>‡,§</sup>  
Departments of <sup>†</sup>Radiation Oncology & <sup>‡</sup>Medicine, University of Washington,  
Seattle, WA

<sup>§</sup>Clinical Research, Fred Hutchinson Cancer Research Center, Seattle, WA

PAGES:

**Table S1:** Tissue distribution of [<sup>123</sup>I]CA12.10C12 conjugated with **4** through reduced disulfides and [<sup>125</sup>I]/[<sup>211</sup>At]CA12.10C12 conjugated with **10** through lysine amines in dogs.

**Figure S1:** Blood clearance curves for [<sup>123</sup>I]CA12.10C12 and [<sup>125</sup>I]CA12.10C12 / [<sup>211</sup>At]CA12.10C12 in dogs

**Table S1:** Concentrations (% injected dose / gram) of radionuclide in tissues from dogs taken at necropsy 24h (dog G996, 1<sup>st</sup> column) and 21.6 h (dog H137, 2<sup>nd</sup> and 3<sup>rd</sup> columns) post injection.

| Tissue                     | CA12.10C12(S)-B10*<br>I-123<br>(% ID/g)** | CA12.10C12(L)-B10*<br>I-125<br>(% ID/g)** | CA12.10C12(L)-B10*<br>At-211<br>(% ID/g)** |
|----------------------------|-------------------------------------------|-------------------------------------------|--------------------------------------------|
| Blood                      | 0.0050 ± 0.0000                           | 0.0057 ± 0.0001                           | 0.0092 ± 0.0001                            |
| Bone Marrow Squeeze        | 0.0484 ± 0.0010                           | 0.0330 ± 0.0000                           | 0.0362 ± 0.0000                            |
| Bone Marrow - Core         | 0.0201 ± 0.0041                           | 0.0505 ± 0.0317                           | 0.0742 ± 0.0440                            |
| Bone Marrow Aspirate       | 0.0087 ± 0.0007                           | 0.0129 ± 0.0000                           | 0.0101 ± 0.0010                            |
| BM asp, ACD, Hep           | (DNO)***                                  | 0.0098 ± 0.0003                           | 0.0072 ± 0.0001                            |
| Rib                        | 0.0124 ± 0.0016                           | 0.0117 ± 0.0015                           | 0.0118 ± 0.0015                            |
| Sternum                    | 0.0231 ± 0.0056                           | 0.0178 ± 0.0030                           | 0.0194 ± 0.0039                            |
| Lymph Node - axial         | 0.0539 ± 0.0000                           | 0.0591 ± 0.0427                           | 0.0476 ± 0.0345                            |
| Lymph Node - submandibular | 0.0827 ± 0.0123                           | 0.1129 ± 0.0314                           | 0.1053 ± 0.0247                            |
| Lymph Node - mesenteric    | 0.0938 ± 0.0280                           | 0.0635 ± 0.0280                           | 0.0531 ± 0.0205                            |
| Lymph Node – popliteal     | 0.0927 ± 0.0000                           | 0.0875 ± 0.0120                           | 0.0964 ± 0.0117                            |
| Kidney - cortex            | 0.2255 ± 0.0563                           | 0.0291 ± 0.0002                           | 0.0167 ± 0.0002                            |
| Kidney - medulla           | 0.1673 ± 0.0147                           | 0.0259 ± 0.0078                           | 0.0229 ± 0.0061                            |
| Bladder                    | 0.0048 ± 0.0010                           | 0.0100 ± 0.0009                           | 0.0050 ± 0.0006                            |
| Salivary gland             | 0.0023 ± 0.0001                           | 0.0035 ± 0.0001                           | 0.0022 ± 0.0000                            |
| Trachea                    | 0.0094 ± 0.0021                           | 0.0049 ± 0.0006                           | 0.0027 ± 0.0000                            |
| Thymus                     | 0.0042 ± 0.0002                           | 0.0054 ± 0.0001                           | 0.0049 ± 0.0003                            |
| Thyroid                    | 0.0020 ± 0.0004                           | 0.6052 ± 0.0267                           | 1.3991 ± 0.0125                            |
| Pancreas                   | 0.0020 ± 0.0001                           | 0.0030 ± 0.0001                           | 0.0020 ± 0.0001                            |
| Gall Bladder               | 0.0434 ± 0.0091                           | 0.2163 ± 0.0412                           | 0.1595 ± 0.0342                            |
| Liver - peripheral         | 0.0992 ± 0.0021                           | 0.0895 ± 0.0024                           | 0.0582 ± 0.0015                            |
| Liver - central            | 0.0139 ± 0.0014                           | 0.0851 ± 0.0022                           | 0.0576 ± 0.0015                            |
| Spleen                     | 0.2961 ± 0.0754                           | 0.2312 ± 0.0430                           | 0.2701 ± 0.0523                            |
| Lung - peripheral          | 0.0136 ± 0.0019                           | 0.0155 ± 0.0012                           | 0.0119 ± 0.0006                            |
| Lung - central             | 0.0139 ± 0.0014                           | 0.0170 ± 0.0005                           | 0.0131 ± 0.0005                            |
| Stomach                    | 0.0628 ± 0.0082                           | 0.0481 ± 0.0077                           | 0.0245 ± 0.0020                            |
| Small intestinal           | 0.0108 ± 0.0027                           | 0.0280 ± 0.0014                           | 0.0228 ± 0.0010                            |
| Skin abdominal             | 0.0024 ± 0.0003                           | 0.0035 ± 0.0005                           | 0.0023 ± 0.0005                            |
| Colon                      | 0.0093 ± 0.0007                           | 0.0162 ± 0.0004                           | 0.0135 ± 0.0005                            |
| Muscle                     | 0.0010 ± 0.0001                           | 0.0014 ± 0.0001                           | 0.0009 ± 0.0002                            |
| Heart                      | 0.0090 (1 sample)                         | 0.0037 ± 0.0001                           | 0.0019 ± 0.0001                            |
| Urine                      | (DNO)***                                  | 0.1066 ± 0.0006                           | 0.0760 ± 0.0005                            |
| Testicle or ovary          | 0.0064 ± 0.0030                           | 0.0062 ± 0.0003                           | 0.0034 ± 0.0002                            |

\*Antibody conjugates with (S) were prepared by conjugation with reduced disulfides, whereas those with (L) indicate the conjugations were through reactions with amines

\*\*Values are an average of 3 samples from different locations in the same tissue ± standard deviation

\*\*\*DNO is an abbreviation for “did not obtain”

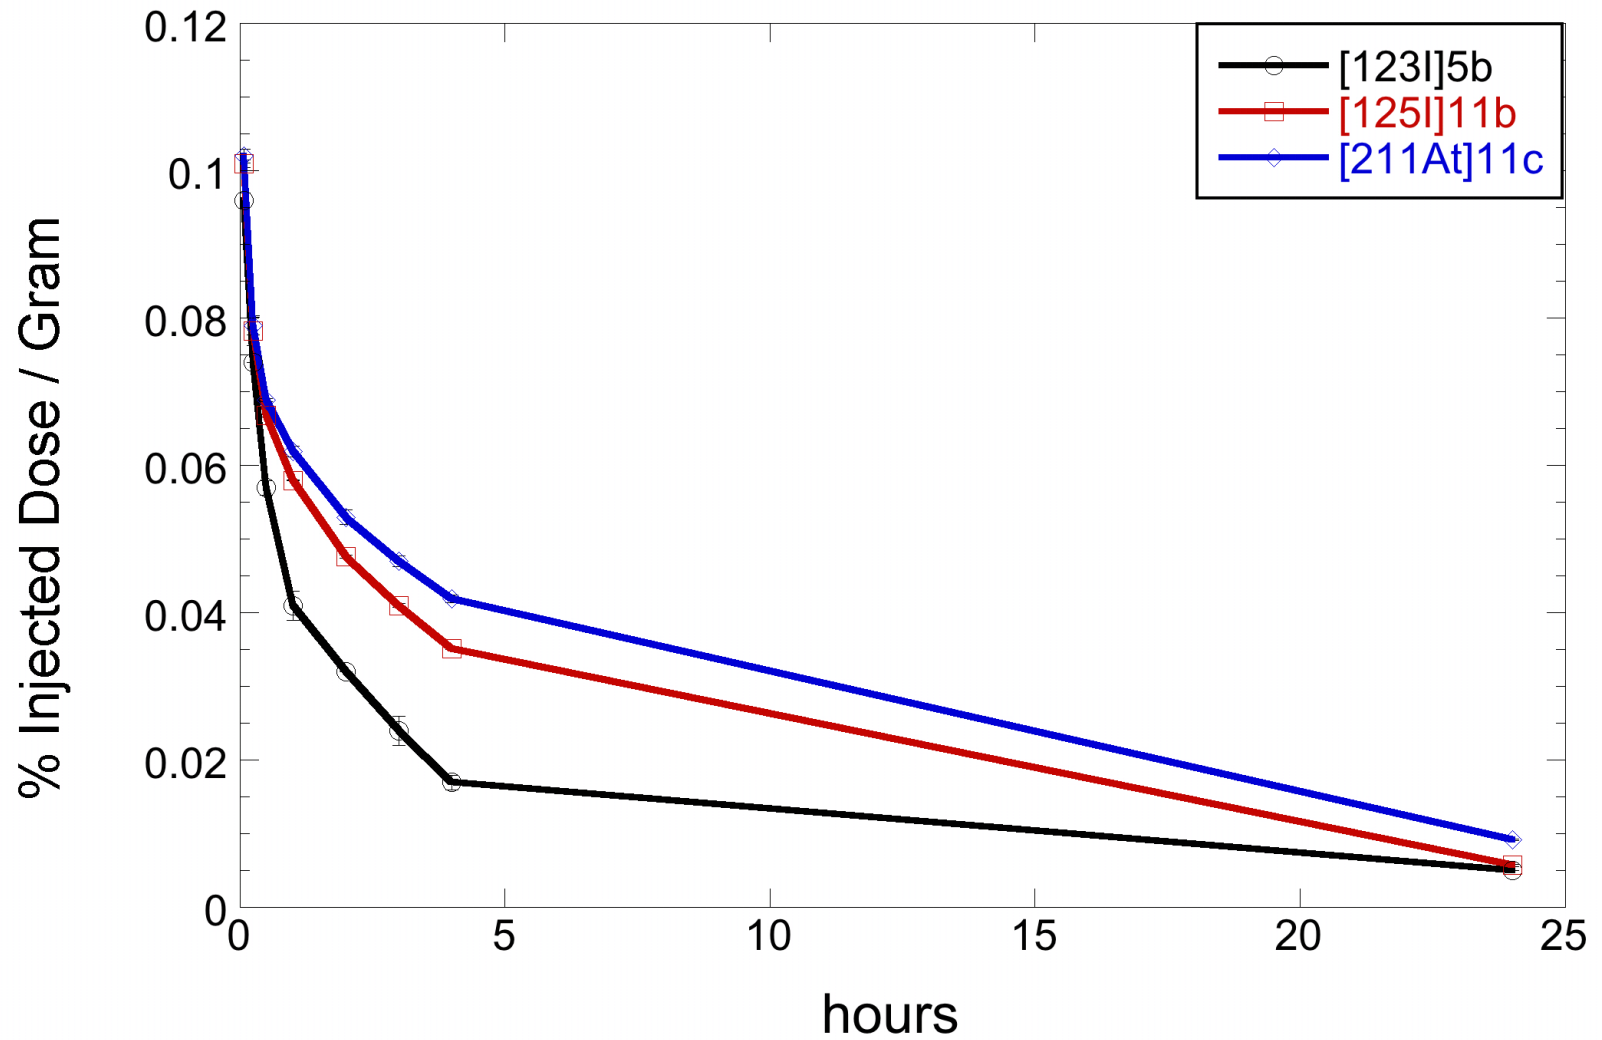

**Figure S1.** Blood clearance of  $^{123}\text{I}$ -labeled CA12.10C12(S)-B10 (dog G996; black line) relative to  $^{125}\text{I}$ - and  $^{211}\text{At}$ -labeled CA12.10C12(L)-B10 (dog H137; red line and blue line, respectively)
